# Supplementary material for: Impact of the coronavirus disease 2019 pandemic on the diversity of notifiable infectious diseases: a case study in Shanghai, China
Source: PeerJ. 2024 Mar 12;12:e17124. doi: 10.7717/peerj.17124 (PMC10941765; doi:10.7717/peerj.17124)
Supplement: Supplemental Information 2 [file peerj-12-17124-s002.xlsx]

## Sheet: S
	HFMD	Syphilis	Gonorrhoea	AIDS	Measles	Brucellosis	Leprosy	Rabies	HD	ID	Hepatitis A	Hepatitis E	Hepatitis B	Hepatitis（unspecified）	BAD	Hepatitis C	Hepatitis D	TP	AHC	Influenza	PT	Scarlatina	Mumps	COVID-19	Pertussis	Rubella	EHF	ECM	H7N9	Malaria	Dengue	EEB	Kala-azar	Cholera
2016-06-01	10592	1217	543	32	14	0	1	0	0	610	12	48	78	43	14	3	0	1	4	62	646	322	252	0	1	6	0	0	0	4	0	0	0	1
2016-07-01	11190	1328	632	39	21	4	0	0	0	780	21	48	52	34	11	8	0	1	3	44	643	89	253	0	0	1	0	0	0	1	0	0	0	0
2016-08-01	5654	1314	681	51	27	1	0	0	0	1280	18	55	56	47	12	5	0	3	2	66	638	56	231	0	3	0	0	0	0	2	2	1	0	0
2016-09-01	3214	1283	621	64	41	2	0	0	0	809	20	55	53	40	28	6	0	4	2	95	616	89	275	0	0	2	0	0	0	2	0	0	0	0
2016-10-01	4586	1108	522	104	10	1	0	0	0	501	15	51	63	27	32	6	0	4	3	227	380	112	212	0	0	1	0	0	0	4	0	0	0	1
2016-11-01	6018	1325	593	41	4	0	0	1	0	303	16	59	51	59	9	5	1	1	1	556	556	251	194	0	1	1	0	0	0	3	0	0	0	0
2016-12-01	4013	1170	561	41	1	1	0	0	0	548	21	86	65	40	10	4	1	3	0	1118	618	470	163	0	0	0	0	0	1	8	0	0	0	0
2017-01-01	1334	905	534	25	1	0	0	0	0	545	20	81	64	32	5	4	0	0	1	782	393	317	114	0	0	0	3	0	2	4	2	0	0	0
2017-02-01	660	914	426	20	0	0	0	0	0	835	42	93	49	43	11	13	0	0	2	487	363	115	78	0	1	0	0	1	1	2	2	0	0	0
2017-03-01	691	1229	611	38	9	0	1	0	0	671	52	97	71	27	4	18	0	0	1	595	594	231	145	0	2	0	0	0	1	2	0	0	0	0
2017-04-01	944	1094	496	34	5	0	0	0	0	286	30	85	41	27	7	6	0	5	1	354	526	446	192	0	6	0	0	0	0	2	1	0	0	0
2017-05-01	1297	1260	515	37	4	1	0	0	0	400	37	96	55	19	9	11	0	2	0	214	551	803	201	0	9	1	1	0	0	3	0	0	0	0
2017-06-01	2260	1361	625	73	3	0	0	0	0	425	20	77	55	36	10	7	0	2	3	80	645	614	205	0	12	1	0	0	0	8	3	0	0	0
2017-07-01	2956	1290	594	44	4	0	0	1	0	567	20	61	49	27	7	8	0	6	2	293	549	167	262	0	14	2	0	0	0	5	2	0	0	0
2017-08-01	1489	1313	557	61	7	0	0	1	0	924	14	83	46	19	16	9	0	1	4	927	623	87	233	0	14	0	0	0	0	3	3	1	0	0
2017-09-01	2159	1241	440	58	8	1	0	0	0	626	17	62	44	25	11	4	0	8	3	933	617	111	299	0	16	0	0	0	0	4	1	0	0	0
2017-10-01	4403	1029	319	94	5	1	0	0	0	324	15	37	56	25	6	3	0	3	1	406	516	131	179	0	3	0	0	0	0	2	3	0	0	0
2017-11-01	3495	1189	387	35	1	1	0	0	0	274	20	65	47	22	2	7	0	2	0	180	496	438	162	0	5	0	0	0	0	4	2	0	0	0
2017-12-01	2604	1107	332	36	2	0	0	0	0	750	15	82	38	34	8	4	0	1	1	893	562	774	139	0	2	0	1	0	0	3	1	0	0	0
2018-01-01	917	954	345	27	2	2	0	2	0	662	14	86	40	24	5	3	0	0	0	1499	503	517	88	0	11	0	0	0	0	4	3	0	0	0
2018-02-01	196	642	245	15	1	0	0	0	0	404	9	77	28	24	5	1	0	2	0	1467	351	124	65	0	5	2	0	1	0	1	1	0	0	0
2018-03-01	567	1050	268	34	14	0	0	0	0	349	26	134	37	45	5	5	1	0	0	662	583	222	142	0	12	2	0	0	0	1	1	0	0	0
2018-04-01	1413	1046	318	32	5	1	1	0	0	350	22	87	75	30	5	5	0	2	1	95	566	485	216	0	8	1	0	1	0	2	0	0	0	0
2018-05-01	4321	1049	343	49	7	0	1	0	0	400	33	76	62	17	4	4	0	0	0	21	630	709	249	0	13	3	0	1	0	1	0	0	0	0
2018-06-01	9021	1192	322	53	7	2	0	0	0	428	19	91	43	30	5	4	1	3	5	12	603	476	275	0	15	2	0	0	0	0	3	0	0	0
2018-07-01	10742	1142	362	57	2	0	0	0	0	517	29	69	51	18	13	4	0	3	0	27	591	154	284	0	9	3	0	0	0	5	10	1	0	0
2018-08-01	7175	1198	390	53	3	1	0	2	0	777	29	81	39	28	12	1	0	2	0	27	579	84	213	0	16	2	0	0	0	1	13	0	0	0
2018-09-01	9749	1162	342	73	5	0	0	0	0	627	26	72	33	25	7	2	0	2	3	37	551	77	231	0	9	4	1	0	0	4	2	0	0	0
2018-10-01	4801	992	305	79	1	1	0	0	0	416	23	41	30	41	6	4	0	0	3	37	494	179	194	0	6	1	0	0	0	4	1	0	0	0
2018-11-01	2149	963	345	30	4	1	0	1	0	424	27	56	20	16	2	6	0	1	0	47	564	499	186	0	5	1	1	0	0	2	1	0	0	0
2018-12-01	1925	1057	323	44	6	0	0	0	1	307	15	100	21	27	5	5	0	0	1	270	501	897	147	0	3	0	0	0	0	1	1	0	0	0
2019-01-01	1086	866	285	27	4	0	2	0	0	418	30	112	20	22	5	5	0	0	0	5649	473	790	118	0	10	4	0	0	0	1	3	0	0	0
2019-02-01	420	727	231	18	4	0	0	0	0	501	21	106	17	7	4	1	0	1	1	4980	326	132	75	0	6	7	1	1	0	1	2	0	0	0
2019-03-01	627	998	251	42	9	0	0	0	0	506	46	103	30	10	5	0	0	1	2	4664	512	275	197	0	13	38	0	1	0	4	2	0	0	0
2019-04-01	1127	1128	280	57	7	0	0	0	0	371	30	103	21	9	5	6	1	2	0	2281	617	333	197	0	21	51	0	1	0	1	1	0	0	0
2019-05-01	2089	1139	259	37	11	0	0	0	0	460	41	92	14	10	2	0	0	2	1	1482	501	343	221	0	24	63	0	1	0	1	6	0	0	0
2019-06-01	3332	1113	238	64	23	0	0	0	0	476	48	65	20	5	3	2	0	3	3	605	497	341	171	0	16	27	1	0	0	0	14	0	0	0
2019-07-01	3884	1145	259	48	2	1	0	0	0	685	39	69	20	17	19	2	0	1	5	317	530	149	203	0	17	17	0	0	0	3	25	0	0	0
2019-08-01	2578	1130	263	54	2	0	0	0	0	730	39	60	12	18	7	8	0	2	3	403	594	100	191	0	16	11	0	0	0	1	18	0	0	0
2019-09-01	3971	1100	257	57	5	1	0	0	1	564	34	52	20	7	14	4	0	3	1	599	605	75	191	0	8	5	0	0	0	4	19	0	0	0
2019-10-01	3049	1023	253	90	1	0	0	0	0	402	18	44	23	15	7	2	0	0	0	286	418	135	221	0	10	12	0	0	0	1	10	0	0	0
2019-11-01	1517	1080	312	43	2	0	0	0	0	426	29	66	25	10	1	4	0	1	0	640	572	351	176	0	6	26	0	0	0	4	5	0	0	0
2019-12-01	1108	1188	300	25	1	0	0	0	0	422	26	68	21	20	3	1	0	2	0	11209	578	702	137	0	2	4	0	1	0	4	1	1	0	0
2020-01-01	413	825	205	19	0	0	0	0	0	244	20	56	17	17	4	3	0	0	0	14406	393	445	66	85	2	1	0	0	0	3	2	0	0	0
2020-02-01	22	444	111	10	0	0	0	0	0	76	16	36	10	3	1	0	0	2	1	525	257	23	32	141	5	2	0	0	0	3	3	0	0	0
2020-03-01	18	620	95	9	0	0	1	0	0	49	19	50	18	3	2	1	0	0	0	147	341	4	30	2	0	3	0	0	0	0	0	0	0	0
2020-04-01	20	852	139	21	1	0	0	0	0	86	25	41	24	5	3	1	0	0	2	39	484	7	49	0	2	3	0	0	0	1	0	0	0	0
2020-05-01	43	766	187	17	1	1	0	0	0	184	18	33	15	2	4	1	0	2	1	26	493	12	62	0	0	3	0	0	0	2	2	0	0	0
2020-06-01	49	878	238	70	0	2	0	0	0	266	11	43	10	1	2	1	0	2	1	66	519	8	88	40	0	1	0	0	0	0	0	0	0	0
2020-07-01	89	926	282	48	2	0	0	0	0	311	27	45	12	1	3	5	0	3	0	61	576	7	92	36	0	2	0	0	0	0	2	0	1	0
2020-08-01	356	852	234	31	1	0	1	0	0	334	11	45	9	1	2	0	0	0	2	37	617	8	108	156	0	0	1	0	0	4	1	1	0	0
2020-09-01	1037	986	298	59	2	0	0	0	0	419	17	55	12	1	4	2	1	4	0	59	609	17	146	102	0	0	0	0	0	3	1	0	0	0
2020-10-01	1535	812	225	93	1	1	0	0	0	291	22	38	15	2	5	2	0	3	0	105	451	20	175	175	0	0	0	0	0	1	0	0	0	0
2020-11-01	1161	901	237	15	1	0	0	0	0	216	17	52	9	0	1	1	0	0	1	121	536	78	202	151	0	0	0	0	0	1	0	0	0	0
2020-12-01	876	859	289	31	1	0	0	0	0	328	21	48	21	3	1	3	0	0	0	114	593	183	166	184	0	0	1	0	0	0	0	0	0	0
2021-01-01	511	765	237	10	0	0	0	0	0	363	13	64	10	0	2	4	0	0	0	126	413	168	94	182	0	0	0	0	0	4	0	0	0	0
2021-02-01	106	721	179	13	1	0	0	0	0	238	15	84	12	1	0	2	0	0	1	48	333	49	56	98	0	0	0	0	0	4	0	0	1	0
2021-03-01	381	934	230	38	0	0	0	0	0	366	11	111	20	2	3	4	0	0	0	63	507	56	125	89	0	2	1	0	0	2	0	0	0	0
2021-04-01	799	963	282	15	1	0	0	0	1	395	23	127	19	1	2	4	0	1	1	95	499	115	121	102	0	0	0	0	0	3	0	0	0	0
2021-05-01	1709	1039	322	21	0	0	0	0	0	362	27	96	15	0	1	3	0	3	0	127	489	126	125	115	4	1	0	2	0	10	0	0	0	0

## Sheet: E
	AP	TE	RH	WS	Prec	AQI	PM2.5	PM10	SO2	NO2	CO	O3	Inbound travel	Social consumption	Industrial output	Airport passenger throughput	Freight volume
2016-06-01	100.63	24.21	86.31	4.42	203.1	79	40	54	10	36	0.703	122	6.925	91.927	262.781	83.935	739.861
2016-07-01	100.48	29.13	83.75	4.08	166.4	95	38	59	10	31	0.752	143	7.003	92.629	258.302	92.836	751.318
2016-08-01	100.46	28.98	75.88	4.48	32.3	59	19	36	11	23	0.665	104	7.185	93.708	274.066	98.035	719.648
2016-09-01	101.08	24.86	78.69	4.66	291.7	68	32	45	12	34	0.723	112	7.403	91.41	292.943	87.63	726.265
2016-10-01	101.68	20.54	84.06	5.4	295.9	51	22	37	12	33	0.632	87	8.455	97.732	290.714	92.285	724.228
2016-11-01	102.23	13.15	84.44	4.59	68.9	78	44	62	16	58	0.867	69	7.609	96.296	316.711	86.376	751.086
2016-12-01	102.55	8.67	82.88	4.44	48.9	94	58	77	19	65	1.058	64	6.869	98.17	333.989	87.659	845.141
2017-01-01	102.63	6.12	82.94	4.76	62.9	73	45	55	17	47	0.945	74	5.629	102.514	280.288	92.004	696.859
2017-02-01	102.55	6.09	77.19	4.57	20.6	77	50	57	14	49	0.868	93	5.718	80.603	246.509	86.431	775.213
2017-03-01	102.05	9.63	77.5	4.7	75.8	71	44	58	12	50	0.768	108	7.87	92.201	302.534	93.218	752.561
2017-04-01	101.35	16.25	76.5	5.05	93.3	91	45	70	12	51	0.83	133	8.042	92.3	305.667	92.111	845.886
2017-05-01	101.13	21.21	76.25	4.99	72.8	88	28	49	11	37	0.674	136	7.719	100.899	298.771	94.519	806.961
2017-06-01	100.71	23.87	79.75	4.25	164.8	83	38	42	9	35	0.7	130	7.178	98.763	303.227	89.413	860.455
2017-07-01	100.58	30.08	77.81	4.04	31.2	117	33	55	10	30	0.706	177	6.982	97.791	300.467	96.903	917.47
2017-08-01	100.53	29.54	78.69	4.12	319.5	97	31	47	8	32	0.781	151	7.154	102.016	301.478	97.642	835.889
2017-09-01	101.1	24.8	79.5	5.05	351.7	74	26	42	9	36	0.77	118	7.618	99.847	318.396	92.709	748.222
2017-10-01	101.93	18.53	82.69	5.8	96.9	58	24	42	9	34	0.732	101	8.237	105.835	309.029	97.71	829.013
2017-11-01	102.29	13.15	79.62	4.36	76.7	78	41	68	13	59	0.863	80	8.012	104.25	314.684	92.723	827.272
2017-12-01	102.74	6.18	74.88	4.26	20.2	97	54	75	15	69	1.061	39	7.141	106.287	304.729	93.309	829.765
2018-01-01	102.56	3.83	81.56	5.09	96.3	88	57	64	13	53	0.89	57	6.374	111.903	344.966	92.872	824.95
2018-02-01	102.44	4.73	79.19	4.73	67.6	70	44	60	12	43	0.725	83	4.706	94.186	233.712	89.088	750.532
2018-03-01	101.9	11.2	84.75	5.2	75.7	65	39	48	11	42	0.581	94	8.237	102.154	302.534	100.806	848.299
2018-04-01	101.47	16.73	77.25	5.26	84.6	78	38	70	12	43	0.593	121	8.202	100.488	305.667	101.268	931.896
2018-05-01	101	22.08	78.5	4.87	171.7	80	41	54	10	38	0.597	125	8.044	98.87	298.771	98.683	940.967
2018-06-01	100.57	24.86	78.69	4.27	66.4	80	32	38	9	29	0.53	133	7.314	106.728	303.227	98.605	945.58
2018-07-01	100.41	29.1	79.94	5.6	113.6	53	19	32	8	22	0.442	90	7.151	100.11	300.467	101.48	916.65
2018-08-01	100.28	29.22	80.5	6.02	249.4	52	15	28	6	19	0.468	93	7.159	103.469	301.478	103.999	961.7
2018-09-01	101.16	25.31	78.94	3.91	193.3	71	24	39	7	34	0.64	111	7.83	106.493	318.396	95.721	903.875
2018-10-01	101.94	18.13	72.06	4.59	35.6	67	25	46	8	41	0.545	110	8.746	104.335	309.029	102.253	935.348
2018-11-01	102.2	14.51	82	4.13	97.8	72	40	46	7	53	0.68	81	8.472	117.063	314.684	94.91	862.859
2018-12-01	102.71	7.83	84.62	5.57	155.8	66	36	50	8	50	0.671	54	7.137	121.07	304.729	96.672	916.001
2019-01-01	102.75	5.58	82.62	4.11	61.4	81	49	61	9	57	0.826	60	6.095	120.138	315.447	100.551	932.133
2019-02-01	102.44	5.97	85.88	4.86	144.9	65	41	51	6	36	0.721	76	5.517	98.84	202.121	95.971	766.073
2019-03-01	101.91	10.51	81.56	4.52	46.3	80	51	65	7	52	0.758	100	8.251	108.625	295.829	101.326	902.109
2019-04-01	101.36	16.21	80.62	4.53	63.8	71	40	51	6	45	0.697	106	8.267	106.578	281.406	101.228	914.805
2019-05-01	101.16	20.25	71.5	4.56	53.1	86	33	53	7	39	0.606	134	7.772	109.288	279.827	104.521	929.015
2019-06-01	100.56	24.23	78.19	4.56	130.4	72	29	31	5	28	0.537	121	7.49	122.675	301.68	102.249	918.79
2019-07-01	100.37	27.29	81.94	4.58	135.2	69	26	32	5	29	0.503	117	7.065	104.37	274.961	107.17	948.379
2019-08-01	100.42	28.51	80.88	4.75	343.3	70	24	34	6	27	0.603	113	7.103	108.117	302.098	105.643	928.197
2019-09-01	101.24	24.3	80.5	4.69	202.9	63	21	32	6	33	0.613	105	7.712	112.698	320.881	98.995	909.279
2019-10-01	101.84	19.51	76.88	4.21	93.1	67	31	56	8	43	0.626	98	8.702	105.792	321.286	103.133	910.789
2019-11-01	102.26	14.13	76.44	4.86	44.6	65	27	57	8	46	0.6	83	8.448	124.32	332.868	98.41	930.043
2019-12-01	102.58	8.51	77.44	4.7	73.8	81	50	52	9	63	0.806	61	7.3	128.233	337.343	98.597	971.231
2020-01-01	102.445	6.53581	84.4835	5.00903	142.7	81	54	45	7	44	0.848	67	4.898	132.837	276.068	92.464	1017.33
2020-02-01	102.541	7.62414	83.0721	4.91103	61.6	55	33	35	6	29	0.617	87	0.825	72.075	133.691	17.226	858.322
2020-03-01	101.89	11.139	79.4048	5.27613	94	57	27	39	6	33	0.574	99	0.66	101.122	254.503	20.342	1116.16
2020-04-01	101.892	14.2737	72.142	4.692	48.8	76	33	54	7	41	0.597	127	0.17	114.809	289.769	21.71	1187.39
2020-05-01	100.893	21.5465	78.1232	5.02226	53.6	84	39	51	7	36	0.726	130	0.469	129.072	287.128	35.378	1208.07
2020-06-01	100.481	25.4457	84.723	4.57033	405.8	68	30	31	6	33	0.697	110	0.531	144.76	318.091	43.452	1141.23
2020-07-01	100.515	26.1723	87.6261	4.43452	343.1	66	27	32	5	32	0.61	105	0.686	129.719	316.148	61.34	1130.66
2020-08-01	100.58	28.9577	84.299	5.19484	190.1	59	20	35	6	23	0.5	103	0.895	141.506	334.799	67.58	1227.17
2020-09-01	101.152	23.8997	77.9773	3.92067	183.8	72	25	38	6	40	0.723	112	0.926	144.505	347.548	72.135	1248.84
2020-10-01	102.023	18.1855	76.6555	4.47065	43.5	58	19	38	7	37	0.59	97	1.009	142.176	339.962	76.802	1246
2020-11-01	102.436	14.638	80.1437	4.76533	51.4	58	27	44	7	42	0.64	78	0.889	170.962	369.441	56.836	1255.57
2020-12-01	102.778	6.57419	75.4952	4.67581	11.8	81	47	53	7	55	0.781	57	0.903	169.754	392.009	51.152	1285.87
2021-01-01	102.598	4.60161	74.501	5.12581	24.5	72	39	67	8	50	0.697	59	0.686	165.861	345.804	41.587	1261.41
2021-02-01	102.182	8.92357	78.3911	5.04429	58.2	53	29	42	6	32	0.586	83	0.582	137.989	240.886	29.856	1055.71
2021-03-01	101.952	11.2697	81.5481	4.91645	76.3	66	36	62	5	40	0.61	86	0.913	151.817	340.426	69.776	1270.45
2021-04-01	101.726	15.7793	75.7227	4.97633	43.1	63	31	48	5	36	0.583	98	0.981	138.551	333.917	77.149	1316.8
2021-05-01	100.883	21.3677	77.3132	4.97	151.8	78	30	50	5	31	0.642	127	1.015	149.277	327.948	76.966	1360.2
